# Supplementary material for: Vitrectomy combined with lens capsule flap transplantation in the treatment of high myopia macular hole retinal detachment: study protocol for a prospective randomised controlled trial
Source: HighWire-hosted journal article supplement (doi:10.1136/bmjopen-2022-064299), 2022-07-01
Supplement: bmjopen-2022-064299supp001_data_supplement.pdf [file bmjopen-2022-064299supp001_data_supplement.pdf]

## Institutional Review Board of Shanghai General Hospital

## Approval Letter of Shanghai General Hospital Institutional Review Board

|                                                                                                                    |                                                                                                                                                                         |                                |               |
|--------------------------------------------------------------------------------------------------------------------|-------------------------------------------------------------------------------------------------------------------------------------------------------------------------|--------------------------------|---------------|
| <b>Approval No:</b> 2022SQ284.1                                                                                    | <b>Review date:</b> June 24, 2022                                                                                                                                       | <b>Project No:</b> 2022SQ284.1 |               |
| <b>Study Protocol</b>                                                                                              | A prospective randomized controlled trial of vitrectomy combined with lens capsule flap transplantation in the treatment of high myopia macular hole retinal detachment |                                |               |
| <b>Project source</b>                                                                                              | Initiated by researchers                                                                                                                                                |                                |               |
| <b>Principal investigator</b>                                                                                      | Tianwei Qian                                                                                                                                                            |                                |               |
| <b>Research Center</b>                                                                                             | Shanghai General Hospital                                                                                                                                               | <b>Department</b>              | Ophthalmology |
| <b>Review documents (including version number)</b>                                                                 |                                                                                                                                                                         |                                |               |
| (1) Study protocol (version: 1.1)                                                                                  |                                                                                                                                                                         |                                |               |
| (2) Resume of principal investigator (version: 1.0)                                                                |                                                                                                                                                                         |                                |               |
| (3) Informed consent (version: 1.1)                                                                                |                                                                                                                                                                         |                                |               |
| <b>1. Review method</b>                                                                                            |                                                                                                                                                                         |                                |               |
| Rapid review                                                                                                       |                                                                                                                                                                         |                                |               |
| <b>2. Results</b>                                                                                                  |                                                                                                                                                                         |                                |               |
| Agree                                                                                                              |                                                                                                                                                                         |                                |               |
| <b>3. The study will be subject to ongoing review by the ethics committee?</b>                                     |                                                                                                                                                                         |                                |               |
| <input checked="" type="checkbox"/> Yes <input type="checkbox"/> No                                                |                                                                                                                                                                         |                                |               |
| The censorship frequency is once every 12 months from the date of approval.                                        |                                                                                                                                                                         |                                |               |
| The ethics committee has the right to change the frequency of continuous review according to the actual situation. |                                                                                                                                                                         |                                |               |
| Institutional Review Board<br>Date: June 24, 2022                                                                  |                                                                                                                                                                         |                                |               |

**Address:** No.100 Haining Road, Shanghai    **Official E-mail:** shiyilunli@sina.com
